# Supplementary material
Source: PubMed Central journal article supplement (PMC8195500)
Supplement: kiab146_supplementary_data.pdf [file kiab146_supplementary_data.pdf]

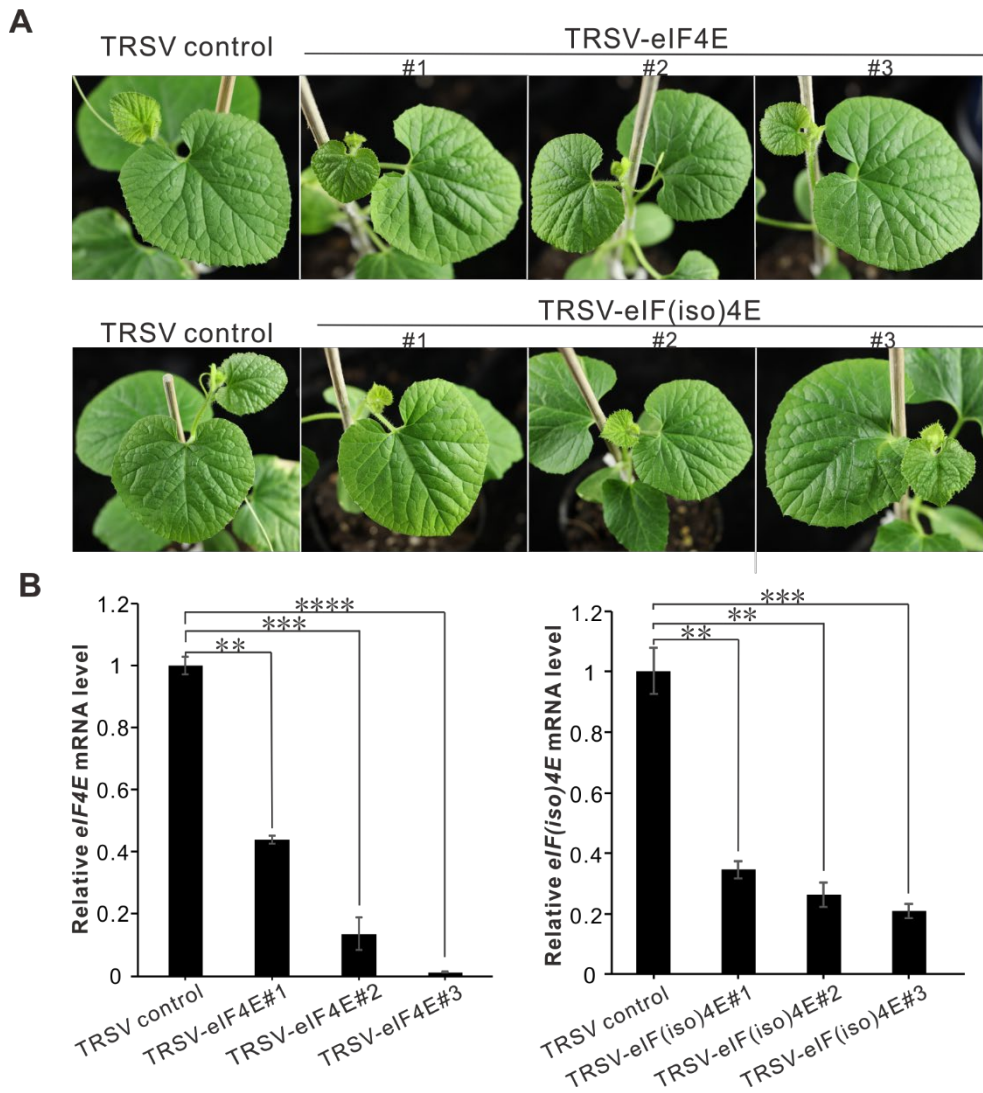

**Supplemental Figure S1.** TRSV-based silencing of *eIF4E* and *eIF(iso)4E* in *Cucumis melo* plants. A. Phenotypes of TRSV-based silencing of *eIF4E* and *eIF(iso)4E* in *Cucumis melo* plants at 20 dpi. B. qRT-PCR analysis of relative expression levels of *eIF4E* and *eIF(iso)4E* in *Cucumis melo* plants. Error bars represent  $\pm$  SD of three biological experiments. Statistical significance between treatments was determined using paired Student's t-test: \* $P < 0.05$ , \*\* $P < 0.01$ , \*\*\* $P < 0.001$ , \*\*\*\* $P < 0.0001$ .

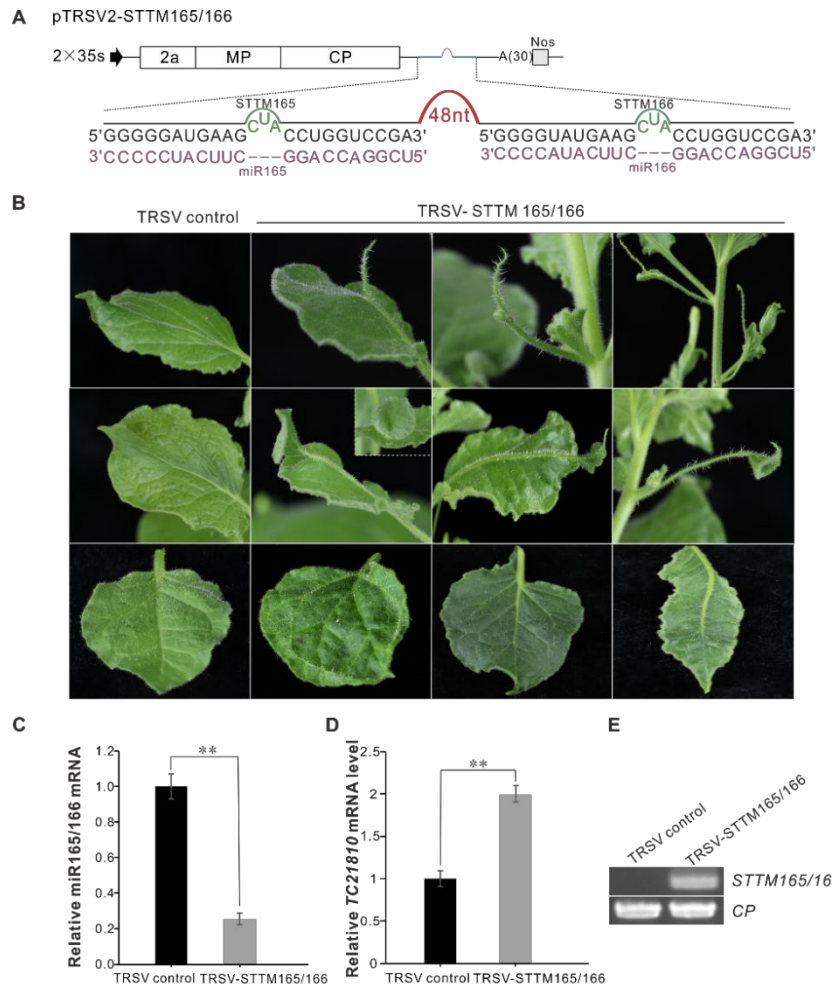

**Supplemental Figure S2.** TRSV-based silencing of miR165/166 in *N. benthamiana* plants. **A.** Schematic representation of pTRSV2-STTM165/166. **B.** The silencing phenotype caused by STTM165/166 at 18 dpai. **C.** Stem-loop RT-PCR detection of miR165/166 level in TRSV (control) and STTM165/166 inoculated *N. benthamiana* plants. **D.** The relative expression level of miR165/166 target gene in *N. benthamiana*. In C and D, error bars represent  $\pm$  SD of three biological experiments. Statistical significance between treatments was determined using paired Student's t-test: \* $P < 0.05$ , \*\* $P < 0.01$ , \*\*\* $P < 0.001$ . **E.** RT-PCR detection confirmed the expression of STTM165/166.

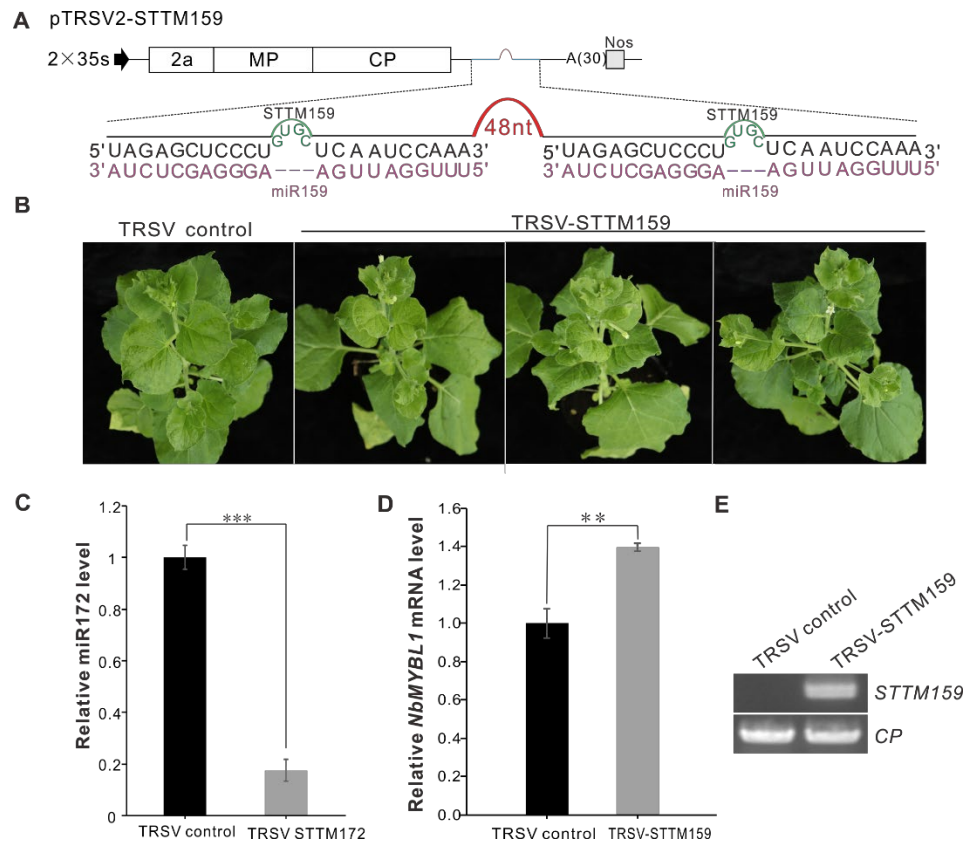

**Supplemental Figure S3.** TRSV-based knockdown of miR159 in *N. benthamiana* plants. **A.** Schematic presentation of pTRSV2-STTM159. **B.** Phenotypes of TRSV-STTM159 infected *N. benthamiana* plants at 20 dpi. **C.** The relative accumulation level of miR159 in TRSV-STTM159 infected *N. benthamiana* plants. **D.** The relative accumulation level of *NbMYBL1* in TRSV-STTM159 infected *N. benthamiana* plants. In C and D, error bars represent  $\pm$  SD of three biological experiments. Statistical significance between treatments was determined using paired Student's t-test: \* $P < 0.05$ , \*\* $P < 0.01$ , \*\*\* $P < 0.001$ . **E.** RT-PCR detection of TRSV infection and TRSV-based expression of STTM159.

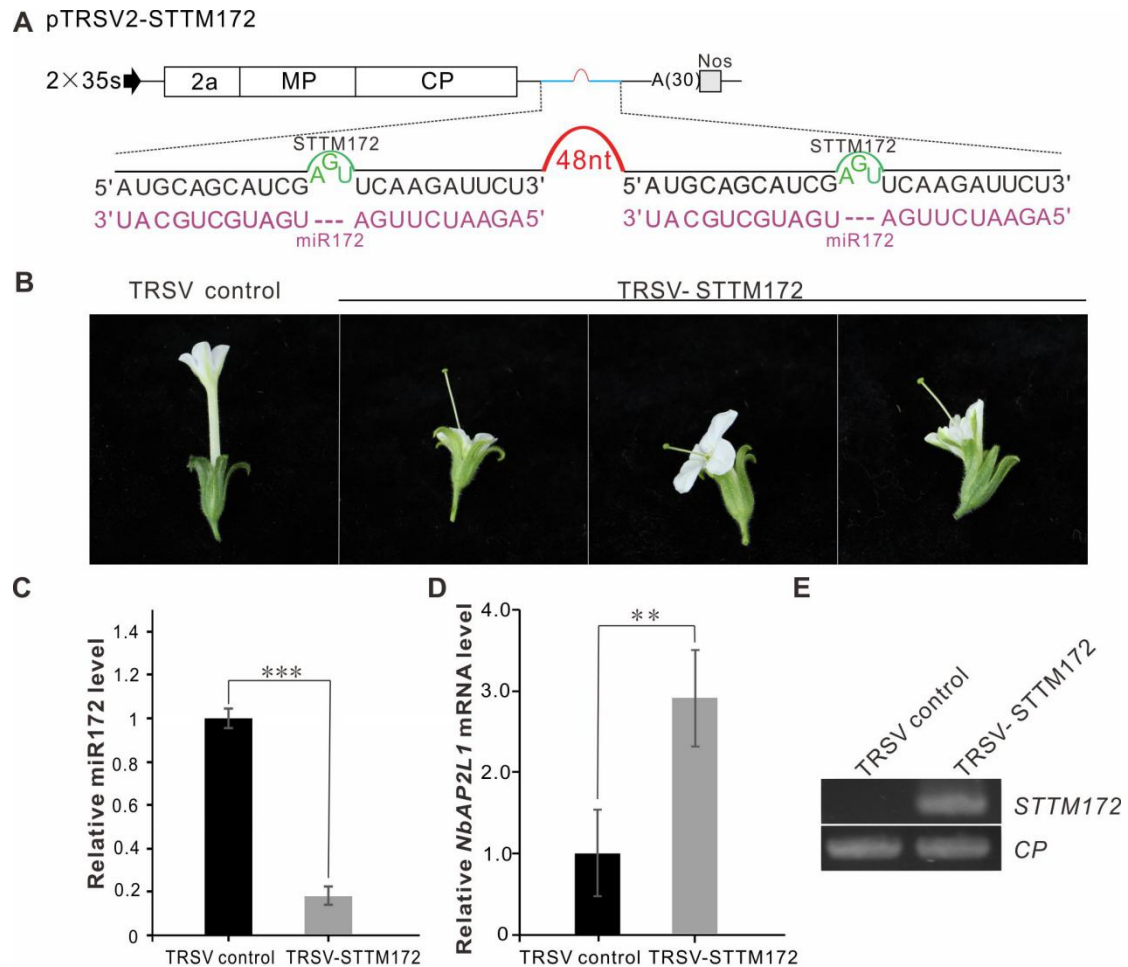

**Supplemental Figure S4.** TRSV-based VbMS of miR172 in *N. benthamiana* plants. **A.** Schematic representation of VbMS vector of miR172. **B.** Flower phenotypes of TRSV-STTM172 infected plants at 21 dpai. **C.** Detection of miR172 level through stem-loop RT-PCR. **D.** qRT-PCR analysis of relative expression level of miR172 target gene *NbAP2L1*. In C and D, error bars represent  $\pm$  SD of three independent experiments. Statistical significance between treatments was determined using paired Student's t-test:  $*P < 0.05$ ,  $**P < 0.01$ ,  $***P < 0.001$ . **E.** RT-PCR detection of miR172 expression in TRSV-STTM172 infected plants.

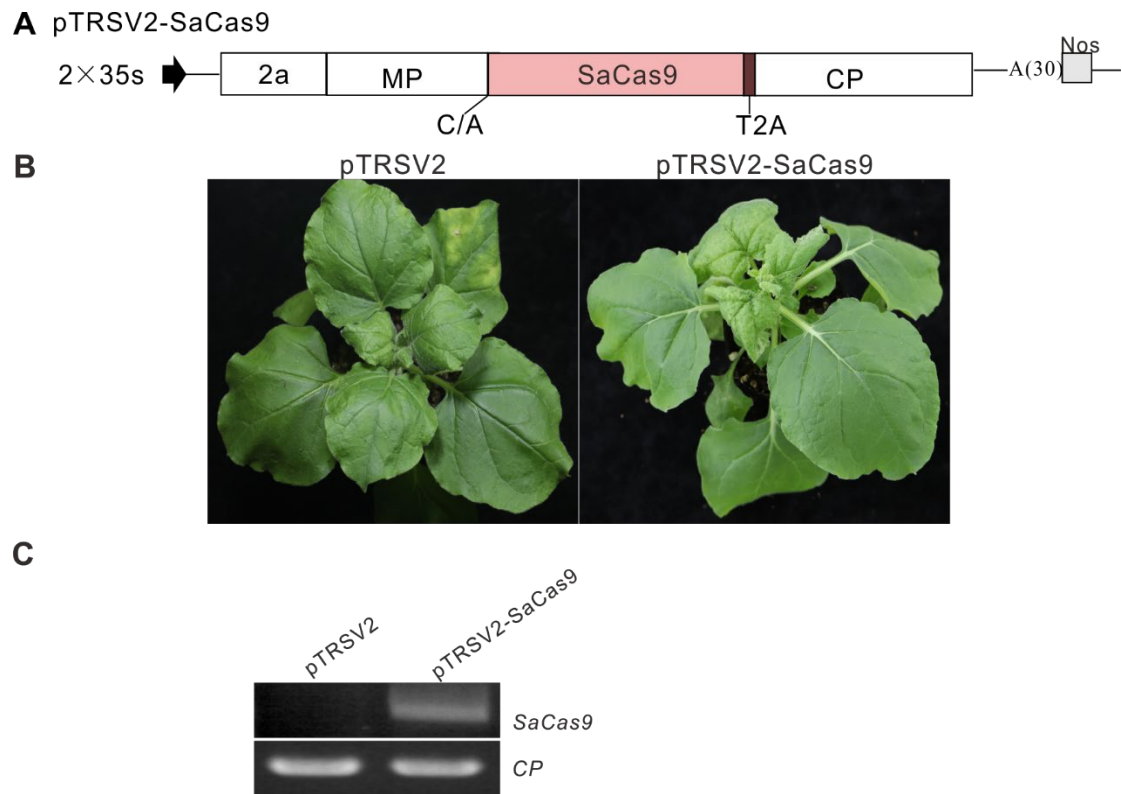

**Supplemental Figure S5.** The expression of *SaCas9* gene using TRSV in *N. benthamiana* plants. **A.** Schematic presentation of pTRSV2-SaCas9. **B.** Symptoms of TRSV-SaCas9 infected *N. benthamiana* plants at 12 dpi. The appearance of mosaic symptom was later in TRSV-SaCas9 infected plants than in TRSV infected plants. **B.** RT-PCR detection of the *SaCas9* expression of TRSV-SaCas9 infected plants.

**Supplemental Table S1.** The silencing efficiency of *PDS* genes

| Plants                   | No. of <i>PDS</i><br>silenced/inoculated plants | Efficiency of<br>silencing <i>PDS</i> (%) |
|--------------------------|-------------------------------------------------|-------------------------------------------|
| <i>Cucumis melo</i>      |                                                 |                                           |
| Repetition 1             | 12/12                                           | 100.0                                     |
| Repetition 2             | 10/12                                           | 83.3                                      |
| Repetition 3             | 12/14                                           | 85.7                                      |
| <i>Citrullus lanatus</i> |                                                 |                                           |
| Repetition 1             | 10/12                                           | 83.3                                      |
| Repetition 2             | 9/12                                            | 75.0                                      |
| Repetition 3             | 12/14                                           | 85.7                                      |
| <i>Cucumis sativus</i>   |                                                 |                                           |
| Repetition 1             | 5/ 12                                           | 41.7                                      |
| Repetition 2             | 4/12                                            | 33.3                                      |
| Repetition 3             | 5/14                                            | 35.7                                      |
| <i>N. benthamiana</i>    |                                                 |                                           |
| Repetition 1             | 16/16                                           | 100.0                                     |
| Repetition 2             | 16/16                                           | 100.0                                     |
| Repetition 3             | 12/12                                           | 100.0                                     |

**Supplemental Table S2.** The silencing efficiency of miR166.

| Plants                   | No. of miR166<br>silenced/inoculated plants | Efficiency of<br>silencing miR166 (%) |
|--------------------------|---------------------------------------------|---------------------------------------|
| <i>Cucumis melo</i>      |                                             |                                       |
| Repetition 1             | 12/16                                       | 75.0                                  |
| Repetition 2             | 10/16                                       | 62.5                                  |
| Repetition 3             | 11/16                                       | 68.8                                  |
| <i>Citrullus lanatus</i> |                                             |                                       |
| Repetition 1             | 4/16                                        | 25.0                                  |
| Repetition 2             | 5/16                                        | 31.3                                  |
| Repetition 3             | 6/16                                        | 37.5                                  |
| <i>Cucumis sativus</i>   |                                             |                                       |
| Repetition 1             | 3/16                                        | 18.8                                  |
| Repetition 2             | 2/16                                        | 12.5                                  |
| Repetition 3             | 3/16                                        | 18.8                                  |
| <i>Luffa aegyptiaca</i>  |                                             |                                       |
| Repetition 1             | 13/16                                       | 81.3                                  |
| Repetition 2             | 12/16                                       | 75.0                                  |
| Repetition 3             | 14/16                                       | 87.5                                  |
| <i>N. benthamiana</i>    |                                             |                                       |
| Repetition 1             | 14/16                                       | 87.5                                  |
| Repetition 2             | 15/16                                       | 93.8                                  |
| Repetition 3             | 12/12                                       | 100.0                                 |

**Supplemental Table S3.** The silencing efficiency of miR159

| Plants                | No. of miR159<br>silenced/inoculated plants | Efficiency of<br>silencing miR159 (%) |
|-----------------------|---------------------------------------------|---------------------------------------|
| <i>Cucumis melo</i>   |                                             |                                       |
| Repetition 1          | 8/16                                        | 50.0                                  |
| Repetition 2          | 6/16                                        | 37.5                                  |
| Repetition 3          | 7/16                                        | 43.8                                  |
| <i>N. benthamiana</i> |                                             |                                       |
| Repetition 1          | 4/16                                        | 25.0                                  |
| Repetition 2          | 5/16                                        | 31.3                                  |
| Repetition 3          | 4/16                                        | 25.0                                  |

**Supplemental Table S4.** The silencing efficiency of miR319

| Plants                   | No. of miR319<br>silenced/inoculated plants | Efficiency of<br>silencing miR319 (%) |
|--------------------------|---------------------------------------------|---------------------------------------|
| <i>Citrullus lanatus</i> |                                             |                                       |
| Repetition 1             | 7/16                                        | 43.8                                  |
| Repetition 2             | 6/16                                        | 37.6                                  |
| Repetition 3             | 8/16                                        | 50.0                                  |



**Supplemental Table S5.** The silencing efficiency of miR172

| Plants                 | No. of miR172<br>silenced/inoculated plants | Efficiency of<br>miR172 silencing (%) |
|------------------------|---------------------------------------------|---------------------------------------|
| <i>Cucumis sativus</i> |                                             |                                       |
| Repetition 1           | 4/16                                        | 25.0                                  |
| Repetition 2           | 5/16                                        | 31.3                                  |
| Repetition 3           | 6/16                                        | 37.5                                  |
| <i>N. benthamiana</i>  |                                             |                                       |
| Repetition 1           | 14/16                                       | 87.5                                  |
| Repetition 2           | 13/16                                       | 81.3                                  |
| Repetition 3           | 16/16                                       | 100.0                                 |

**Supplemental Table S6. Sequences of primers used in this paper.**

| Primer Name                 | Primer Sequence                                            |
|-----------------------------|------------------------------------------------------------|
| GFP-1F                      | ATGCTGCGGTACTCTTAGTTTCAAAGTGCCTATGAGTAAAGGAGAAGAACTTTTC    |
| GFP-2F                      | GCTGTACACAGTAGTACCTGACCCTACATGCTGCGGTACTCTTAGTTTC          |
| GFP-1R                      | CACAGGTTAGCAAGCTTCTCTCCCTTCTGCTCTTTGTAGAGCTCATCCATGC       |
| GFP-2R                      | TGGCCCTGGATTTTCTCAACGTCTCCACAGGTTAGCAAGCTTCTCTCTC          |
| SaCas9-F                    | ATGGATTACAAGGATCACGATGGTG                                  |
| SaCas9-R                    | ACCCTTCTTAATGATCTGAGGGTGC                                  |
| TRSV2 <i>Sna</i> BI-F       | TTTACGTAGGTGTTTTGTGTGTGATTCTTCTAACC                        |
| TRSV2 <i>Sna</i> BI-R       | CAAAACACCTACGTAAAGGCATTTAAACAAAGTGG                        |
| CuPDS- <i>Sna</i> BI-F      | AAATACGTATTTGGGGCTTATCCCAA                                 |
| CuPDS- <i>Sna</i> BI-R      | AAATACGTATCTCATCCACTCTTGC                                  |
| CueIF4E- <i>Sna</i> BI-F    | AAATACGTACTCTCCAATTTGTCCGCGTC                              |
| CueIF4E- <i>Sna</i> BI-R    | AAATACGTATTTATCCTGCCAGACCTAACATTAAC                        |
| CueIF(iso)- <i>Sna</i> BI-F | AAATACGTAAAAATGGACCTTTTGGTTTGATAACC                        |
| CueIF(iso)- <i>Sna</i> BI-R | AAATACGTATTCCTACCAATGCTCATCTGAGC                           |
| Cuactin-F                   | TTGGTGATGAAGCTCAGTC                                        |
| Cuactin-R                   | TAGGATAGCATGAGGGAGTG                                       |
| NbPDS <i>Sna</i> BI-F       | AAATACGTAATGCAGAACCCTGTTTGG                                |
| NbPDS <i>Sna</i> BI-R       | AAATACGTAGTTAAGTGCCTTTGAC                                  |
| Nb EF1 $\alpha$ -F          | AGACCACCAAGTACTACTGCAC                                     |
| Nb EF1 $\alpha$ -R          | CCACCAATCTTGACACATCC                                       |
| CP-F53                      | AGGTTTTTCATGCTTAAAGATG                                     |
| NbmiR165-R1                 | ATAACAACAACAACTCGGACCAGGTAGCTTCATCCCCAAGGCATTTAAACAAAGTGG  |
| miR165-R2                   | CCATTCTTCTTTAGACCATATTTAAATTAGACCATAACAACAACAACTCGGACC     |
| NbmiR165-R3                 | CAAAACACCTAATTATCGGACCAGGTAGCTTCATACCCCATCTTCTTTAGACCAT    |
| CumiR166-R1                 | ATAACAACAACAACTCGGACCAGGTAGCTTCATCCCCAAGGCATTTAAACAAAGTGG  |
| CumiR166-R3                 | CAAAACACCTAATTATCGGACCAGGTAGCTTCATCCCCATTCTTCTTTAGACCAT    |
| miR159-R1                   | TAACAACAACAACCTTGGATTGAGCACAGGGAGCTCTAAAGGCATTTAAACAAAGTGG |
| miR159-R2                   | TCTAATTCTTCTTTAGACCATATTTAAATTAGACCATAACAACAACAACCTTGGGA   |
| miR159-R3                   | CAAAACACCTAATTATTTGGATTGAGCACAGGGAGCTCTAATTCTTCTTTAGACC    |
| miR319-R1                   | ATAACAACAACAACCTTGGACTGAATAGGGGAGCTCCCAAGGCATTTAAACAAAGTGG |
| miR319-R2                   | CCCATTCTTCTTTAGACCATATTTAAATTAGACCATAACAACAACAACCTTGGACTG  |
| miR319-R3                   | CAAAACACCTAATTATTTGGACTGAATAGGGGAGCTCCCATCTTCTTTAGACC      |

|                |                                                              |
|----------------|--------------------------------------------------------------|
| NbmiR172-R1    | ATAACAACAACAACAGAATCTTGAAC TCGATGCTGCATAAGGCATTTAAAACAAAGTGG |
| miR172-R2      | ATATTCTTCTTCTTTAGACCATATTTAAATTAGACCATAACAACAACAACAGAATCTTG  |
| NbmiR172-R3    | CAAAACACCTAATTAAGAATCTTGAAC TCGATGCTGCATATTCTTCTTCTTTAGACCAT |
| CumiR172-R1    | ATAACAACAACAACAGAATCTTGAAC TTGATGCTGCATAAGGCATTTAAAACAAAGTGG |
| CumiR172-R3    | CAAAACACCTAATTAAGAATCTTGAAC TTGATGCTGCATATTCTTCTTCTTTAGACCAT |
| qNbmiR166-RT-R | GTCGTATCCAGTGCAGGGTCCGAGGTATTGC ACTGGATACGACGGGGTA           |
| qNbmiR166-F    | GCGTCGGACCAGGCTTCA                                           |
| qNbmiR166-R    | AGTGCAGGGTCCGAGGTATT                                         |
| qCumiR166-RT-R | GTCGTATCCAGTGCAGGGTCCGAGGTATTGC ACTGGATACGACGGGGAA           |
| qCumiR166-F    | GCGTCGGACCAGGCTTCA                                           |
| qCumiR166-R    | AGTGCAGGGTCCGAGGTATT                                         |
| qmiR159-RT-R   | GTCGTATCCAGTGCAGGGTCCGAGGTATTGC ACTGGATACGACTAGAGC           |
| qmiR159-F      | CGCGTTTGGATTGAAGGGA                                          |
| qmiR159-R      | CGCGTTTGGATTGAAGGGA                                          |
| qmiR319-RT-R   | GTCGTATCCAGTGCAGGGTCCGAGGTATTGC ACTGGATACGACAGGGAG           |
| qmiR319-F      | CGCGTTGGACTGAAGGGAG                                          |
| qmiR319-R      | AGTGCAGGGTCCGAGGTATT                                         |
| qmiR172-RT-R   | GTCGTATCCAGTGCAGGGTCCGAGGTATTGC ACTGGATACGACATGCAG           |
| qmiR172-F      | GCGCGAGAATCTTGATGATG                                         |
| qmiR172-R      | AGTGCAGGGTCCGAGGTATT                                         |
| qNbTC2180-F    | TCATGGCGTCCGTACTTTGA                                         |
| qNbTC2180-R    | GGGTTTGAACAGAAAAGCAACCT                                      |
| qCuCML-F       | GGCTTCTTGGGTTGGATGCTG                                        |
| qCuCML-R       | ACTTGGAGTTCGGTGGCGGAT                                        |
| qNbMYBL1-F     | CATCACCCATCATTCTCCGGT                                        |
| qNbMYBL1-R     | GACCACTGTTCCGAGGTGAC                                         |
| qNbLA-F        | GCGGATTCTCTGGGTTTCG                                          |
| qNbLA-R        | CCATCGTGCTCCTCTTCTTCA                                        |
| qCuTCP4-F      | GGGAGATTGTGGAGGTTTC                                          |
| qCuTCP4-R      | CTGGATGGCGGTATGAG                                            |
| qNbAP2-F       | CGTATTCGGATAGGGACC                                           |
| qNbAP2-R       | TCAAAGCACAACCAGTGAC                                          |
| qCuAP2-F       | GTAAATGCCACCGACGAG                                           |
| qCuAP2-R       | GAGACGACCCAGAATCCC                                           |

qNbeIF4A-F GCTTTGGTCTTGGCACCTACTC

qNbeIF4A-R TGCTCGCATGACCTTTCAA

---
